# Digital innovations and emerging technologies for enhanced recovery programmes

F. Michard<sup>1,\*</sup>, T. J. Gan<sup>2</sup> and H. Kehlet<sup>3</sup>

<sup>1</sup>MiCo, Chemin de Chapallaz 4, Denens, Switzerland, <sup>2</sup>Department of Anesthesiology, Stony Brook University, Stony Brook, NY 11794-8480, USA and <sup>3</sup>Section for Surgical Pathophysiology 7621, Rigshospitalet, Blegdamsvej, 92100 Copenhagen, Denmark

\*Corresponding author. E-mail: frederic.michard@bluewin.ch

## Abstract

Enhanced recovery programmes (ERPs) are increasingly used to improve post-surgical recovery. However, compliance to various components of ERPs—a key determinant of success—remains sub-optimal. Emerging technologies have the potential to help patients and caregivers to improve compliance with ERPs. Preoperative physical condition, a major determinant of postoperative outcome, could be optimized with the use of text messages (SMS) or digital applications (Apps) designed to facilitate smoking cessation, modify physical activity, and better manage hypertension and diabetes. Several non-invasive haemodynamic monitoring techniques and decision support tools are now available to individualize perioperative fluid management, a key component of ERPs. Objective nociceptive assessment may help to rationalize the use of pain medications, including opioids. Wearable sensors designed to monitor cardio-respiratory function may help in the early detection of clinical deterioration during the postoperative recovery and to address 'failure to rescue'. Activity trackers may be useful to monitor early mobilization, another major element of ERPs. Finally, electronic checklists have been developed to ensure that none of the above-mentioned ERP elements is omitted during the surgical journey. By optimizing compliance to the multiple components of ERPs, digital innovations, non-invasive techniques and wearable sensors have the potential to magnify the clinical and economic benefits of ERPs. Among the growing number of technical innovations, studies are needed to clarify which tools and solutions have real clinical value and are cost-effective.

**Key words:** enhanced recovery programme; digital innovation; wearable sensor

Since the initial description and implementation by Henrik Kehlet in 1997,<sup>1</sup> enhanced recovery programmes (ERPs) have been increasingly used to improve quality of surgical care across multiple specialties and countries. Although the name of such programmes may differ (ERAS for enhanced recovery after surgery, PSH for perioperative surgical home, ERIN for enhanced recovery in National Surgical Quality Improvement Program (NSQIP)), the process and goals are similar: establish a structure, organize and facilitate the integration of evidence-based components of care into practice over the entire duration of the surgical journey. Multiple studies have shown, and several meta-analyses have confirmed, the

ability of ERPs to decrease postoperative complications and costs, and to shorten hospital length of stay.<sup>2–4</sup>

However, many clinicians have found the multifaceted and multiple elements of ERPs are difficult to implement and track.<sup>5,6</sup> In this regard, several studies have shown that compliance to ERPs is not always consistent, and that outcome benefits are directly proportional to the level of adherence.<sup>7–9</sup> Although leadership, motivation and coordination between stakeholders (surgeons, anaesthesiologists, nurse anaesthetists, nurses, physiotherapists, quality officers, etc.) play a major role in the successful implementation of ERPs,<sup>10</sup> emerging technologies can potentially

help in many ways. The goal of the present narrative review is to describe and discuss the potential value of digital innovations, non-invasive technologies and wearable sensors to improve compliance to ERPs before, during and after surgery.

### Smartphone applications (Apps) and text messages (SMS) for prehabilitation

The preoperative visit presents an opportunity to assess and optimize patient physiological condition before surgery, a major predictor of postoperative outcome.<sup>11–13</sup> Many Apps, downloaded on mobile phones or electronic tablets, may help prehabilitation by allowing improved management of risk factors.<sup>14</sup> Several of these Apps allow the connection between a smartphone and an electronic scale, a wireless blood pressure cuff, a glucometer, a wrist band or a watch equipped with accelerometers tracking physical activity. These Apps can be used to visualize trends over time, and thus provide an incentive for patients to maintain their weight, blood pressure and blood glucose within the normal range, as well as to increase their physical activity. Sending SMS to remind patients on preventative lifestyle and dietary measures has also been proposed to better manage the risk factors.<sup>15</sup> Systematic reviews and meta-analyses have confirmed that digital Apps and SMS may help to reduce body weight,<sup>16</sup> control hypertension,<sup>17</sup> improve glycaemic control,<sup>18</sup> increase physical activity<sup>19</sup> and for smoking cessation.<sup>20</sup> Because of frequent user dropout, the long-term effect of digital health interventions (Apps and SMS) has been questioned in the general population or in patients with

chronic diseases.<sup>14 15</sup> However, this should be less of a problem over short periods of time before surgery. Finally, Apps and SMS could also be used to remind patients when to take or stop their medications, and may therefore have value to ensure patients adhere to preoperative recommendations.<sup>21</sup> Because digital interventions are inexpensive, studies are urgently needed to confirm their ability to facilitate and improve prehabilitation.

### New tools for perioperative fluid management

**Non-invasive haemodynamic monitoring:** Fluid therapy is a key component of perioperative management and a key determinant of postoperative outcome.<sup>22–24</sup> A recent consensus article highlighted the risk of giving too little or too much fluid.<sup>25</sup> In high-risk clinical situations (e.g. estimated blood loss >500 ml, patients with co-morbidities) goal-directed fluid therapy (GDFT) has been proposed to tailor or individualize fluid management.<sup>25 26</sup> Studies have shown that GDFT protocols may decrease postoperative complications and hospital length of stay in various surgical populations.<sup>27 28</sup> Most GDFT protocols are based on flow parameters (stroke volume, cardiac output) or dynamic predictors of fluid responsiveness (pulse pressure variation, stroke volume variation). These haemodynamic parameters are usually measured by invasive haemodynamic monitoring techniques (thermodilution, invasive arterial pressure waveform analysis) or the oesophageal Doppler, a minimally invasive but operator-dependent method. Easy to use and non-invasive technologies have recently emerged<sup>29</sup> (Fig. 1). These new technologies include volume

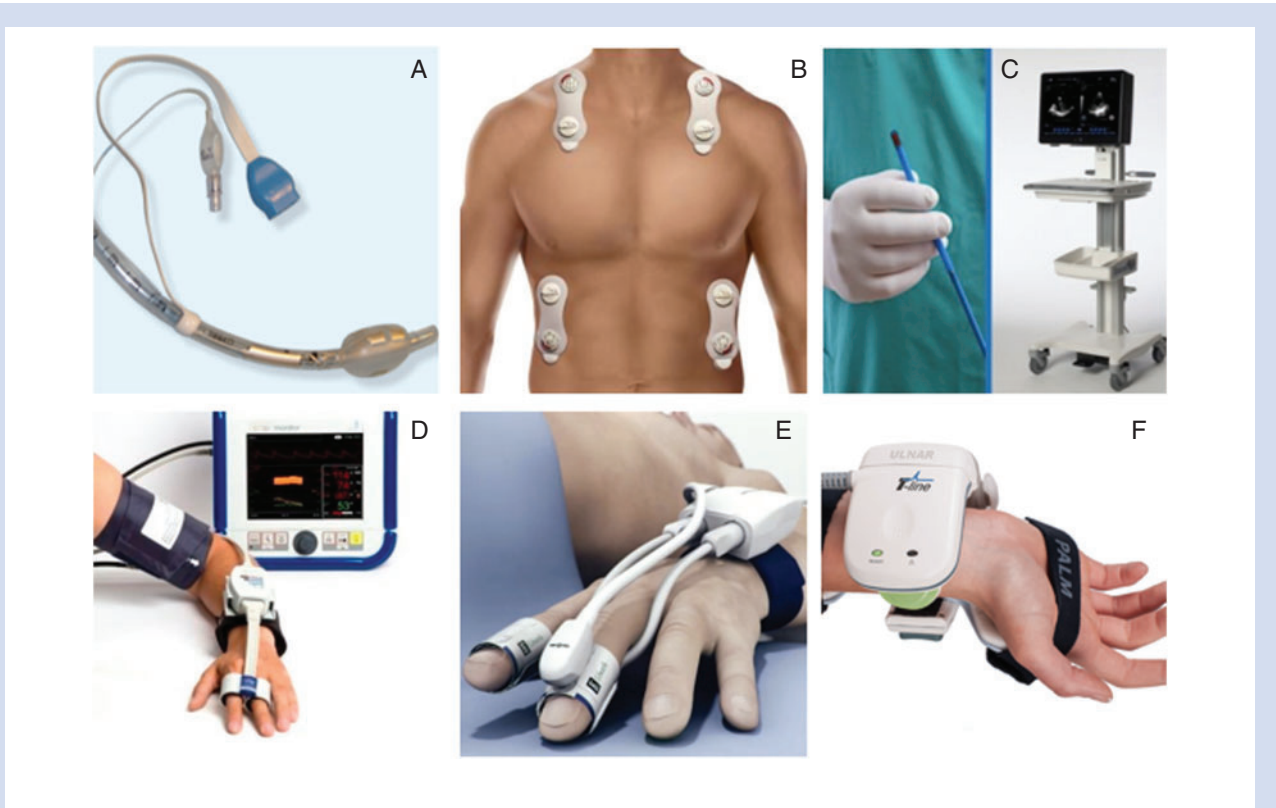

**Fig 1** Examples of non-invasive haemodynamic monitoring techniques. (A) Bioimpedance tracheal tube (ECOM, San Juan Capistrano, CA, USA), (B) bioreactance electrodes (Cheetah, Newton Center, MA, USA), (C) miniaturized single-use transoesophageal echocardiography probe (Imacor, Garden City, NY, USA), (D, E) volume clamp finger cuff systems (CNSystems, Graz, Austria and Edwards, Irvine, CA, USA) and (F) applanation tonometry wrist device (Tensys, San Diego, CA, USA).

clamp methods and applanation tonometry for the continuous monitoring of blood pressure and advanced haemodynamic variables,<sup>30</sup> as well as bioimpedance tracheal tubes<sup>31</sup> and bioresistance surface electrodes<sup>32</sup> to monitor flow variables. Miniaturized and single-use transoesophageal echo probes are now available for visual monitoring of cardiac function and perioperative fluid needs.<sup>33</sup> In mechanically ventilated patients, the mere quantification of respiratory variations in the pulse oximetry waveform may also help to titrate fluid administration.<sup>34</sup> A few studies have already evaluated the effects of GDFT with non-invasive haemodynamic tools but failed to show any significant benefit on postoperative outcome.<sup>35–37</sup> However, some of these studies were underpowered, and little is known about the level of adherence to GDFT protocols. Therefore, more studies are needed to clarify the role of GDFT with new and non-invasive haemodynamic monitoring techniques in the context of ERPs.<sup>38</sup>

**Decision support tools:** Distraction and lack of tracking tools may explain why GDFT protocols are not always properly followed.<sup>39</sup> Visual displays—namely target screens—have been developed by several manufacturers to help clinicians achieving individualized haemodynamic targets (Fig. 2). These screens may be useful to improve adherence to GDFT protocols, but this remains to be proven.<sup>41</sup> Another option to improve adherence to protocols and decrease human factor variability is to use automatic or closed-loop fluid administration systems. Such devices are currently under development and have passed the feasibility phase.<sup>42</sup>

Clinical studies are now needed to investigate their safety and their ability to achieve higher adherence rates than manual control by clinicians using visual decision support tools.

### Emerging technologies for pain assessment

The optimal management of acute post-surgical pain is a key component of ERPs. Firstly, pain itself prolongs time to recovery milestones and delays discharge after surgery.<sup>43</sup> Secondly, opioids are still the mainstay of most postoperative analgesic regimens. While effective even for severe pain, their use prolongs length of stay due to dose-dependent side effects such as respiratory depression, sedation, postoperative nausea and vomiting, urinary retention and ileus.<sup>44</sup> Multimodal postoperative analgesia is defined as the use of more than one pain control modality to achieve effective analgesia while reducing opioid-related side effects.<sup>45</sup> Multimodal analgesia is a key element of ERPs but determining what are the optimal doses and combinations of pain medications remains a challenge. Several emerging technologies aim to quantify the degree of nociception using a variety of physiological variables. Heart rate and blood pressure changes, heart rate variability, pulse wave amplitude, skin conductance and electroencephalographic signals have been proposed for the objective assessment of pain.<sup>46–48</sup> However, they may lack of sensitivity or specificity when used individually.<sup>49 50</sup> It has therefore been suggested to combine several parameters to

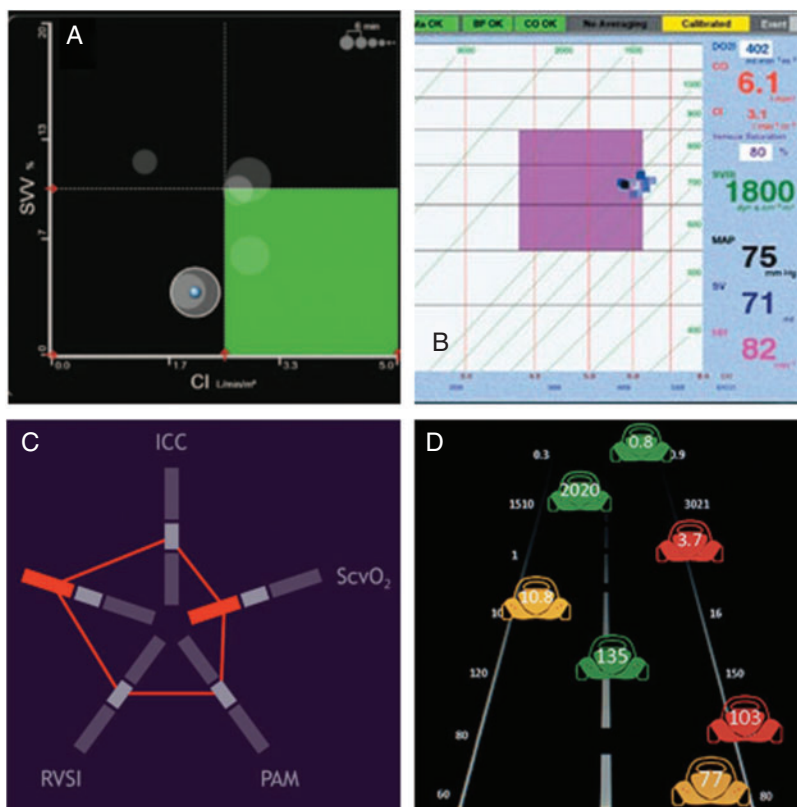

**Fig 2** Examples of visual decision support tools. These screens are designed to help clinicians chasing haemodynamic targets in the context of individualized fluid management. Two dimensions (A from Edwards, Irvine, CA, USA and B from LiDCO, London, UK) and multidimensions (C from Pulsion, Munich, Germany and D from Tensys, San Diego, CA, USA) target screens.

better reflect the complex nature of pain.<sup>50</sup> The nociception level (NoL) index (Medasense, Ramat Gan, Israel) is a multidimensional index based on the non-linear combination of heart rate, heart rate variability, photoplethysmograph wave amplitude, skin conductance, skin conductance fluctuations and their time derivative, all obtained from a single finger sensor.<sup>51</sup> In 72 patients undergoing surgery, Martini and colleagues<sup>51</sup> showed that the NoL index outperforms heart rate and mean arterial pressure changes in differentiating noxious from non-noxious stimuli, and that under non-nociceptive conditions it is not influenced by opioid administration. Another recent study<sup>52</sup> showed during elective surgery that the NoL index responded progressively to increased noxious stimulus and discriminated noxious from non-noxious stimuli with a sensitivity of 87% and a specificity of 84%. Interestingly, the NoL index was also able to discriminate between two different opioid concentrations.<sup>52</sup> Studies are now needed to investigate how the objective assessment of pain impacts the use of pain medications, in particular of opioids, and whether it may help to enhance post-surgical recovery.

### Tackling failure to rescue with innovative monitoring solutions

Postoperative complications are increasingly recognized as a major healthcare issue. The recent and large International

Surgical Outcomes Study (ISOS) showed that 17% of patients undergoing inpatient surgery develop one or more complications.<sup>53</sup> The postoperative morbidity rate increased to 27% after major surgery, 30% in ASA III patients, 53% in ASA IV patients and 50% in patients who were admitted to a critical care unit as routine immediately after surgery. In addition, 2.8% of patients who developed a postoperative complication died before hospital discharge (failure to rescue). Postoperative mortality has been identified as the third leading cause of death in the USA, just behind heart diseases and cancer.<sup>54</sup> Importantly, many patients die in the wards, where the clinician/patient ratio is low and where patients are not continuously monitored.<sup>53 55</sup> Monitoring patients beyond the operating room and the intensive care unit (ICU) may allow the early detection of clinical deterioration and timely intervention.<sup>56 57</sup>

Despite the emergence of multimodal analgesia, opioid-induced respiratory depression remains responsible for some preventable deaths.<sup>58 59</sup> Several variables can be monitored to detect early respiratory depression and decrease the number of neurological sequelae or deaths. These variables include arterial oxygen saturation (with pulse oximeters), end tidal CO<sub>2</sub> (with capnographic sensors), respiratory sounds (with acoustic sensors) and minute ventilation (with thoracic impedance sensors) (Fig. 3). Taenzer and colleagues<sup>60</sup> implemented a monitoring system (Patient SafetyNet from Masimo, Irvine, CA, USA)

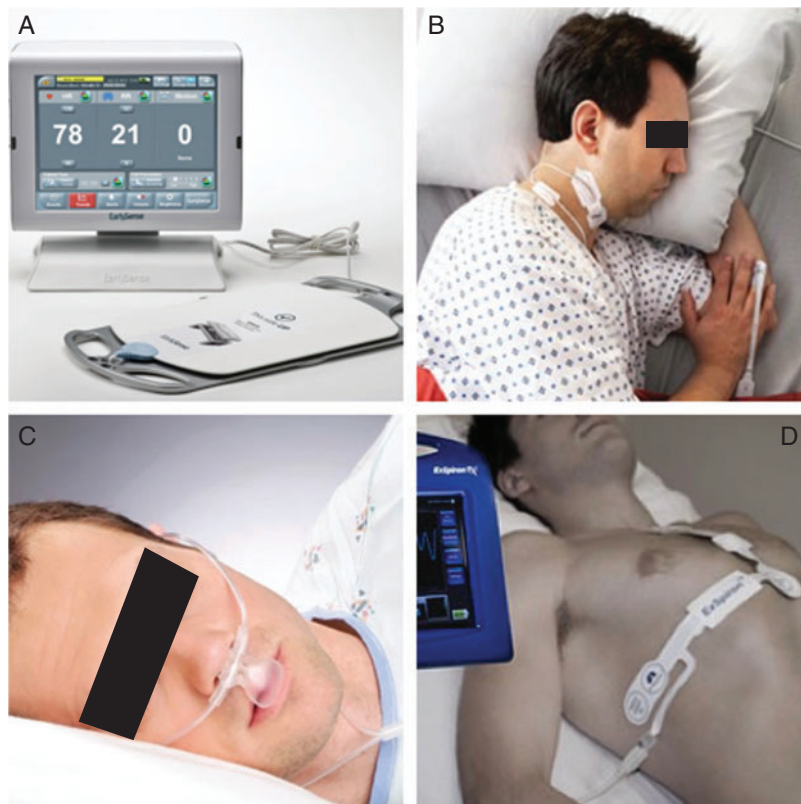

**Fig 3** Examples of monitoring solutions to detect respiratory complications. (A) Contact-free piezo electric sensor (EarlySense, Ramat Gan, Israel), to be placed below the mattress, detecting the patient's heart rate (HR) and respiratory rate (RR). (B) Pulse oximeter (finger) and acoustic sensor (neck) to monitor HR, arterial oxygen saturation (SpO<sub>2</sub>) and RR (Masimo, Irvine, CA, USA). (C) Capnographic sensor to monitor RR (Covidien, Boulder, CO, USA). (D) Impedance thoracic sensor to monitor RR, tidal volume and minute ventilation (Respiratory motion, Waltham, MA, USA).

based on pulse oximetry in over 2800 in-patients. The system was used to continuously monitor arterial oxygen saturation and heart rate, and alert nurses via wireless pager when physiological limits were violated. After the implementation of this system, they observed a 65% decrease in rescue events and a 48% decrease in ICU transfers. More studies are needed to confirm these findings and investigate the value of other monitoring methods.

Because they are 100% preventable, opioid-induced deaths have retained much attention over the last decade. But most common postoperative adverse events are infectious and cardiac complications.<sup>53–61</sup> Clinical deterioration in the wards may remain undetected for hours before clinicians are alerted and subsequently react.<sup>62</sup> A few studies have already suggested that combining respiratory and cardiac monitoring can potentially translate into a better postoperative outcome. In a multicentre international cohort study of >18000 patients, Bellomo and colleagues<sup>63</sup> investigated the value of an advisory vital signs monitoring system (Intellivue MP5SC, Philips, Boeblingen, Germany). The system automatically monitored patient temperature, blood pressure, heart rate and arterial oxygen saturation. These variables were used, in combination with respiratory rate and information on conscious state manually entered by the nurse, to calculate an early warning score used to alert caregivers in case of clinical deterioration. This new strategy, based on vital signs monitoring, was associated with improved survival after rapid response team treatment and with a decrease in median length of hospital stay. More recently, Brown and colleagues<sup>64</sup>

used a contact-free sensor (EarlySense, Ramat Gan, Israel), placed under the mattress, to continuously monitor heart rate and respiratory rate in 2314 patients hospitalized in a medico-surgical unit. They observed a significant reduction in the rate of calls for cardiac arrest and in hospital length of stay when comparisons were made with a large historical group of patients or with a parallel control group who did not benefit from the new monitoring system.

The ongoing development of wireless and wearable sensors (Fig. 4) creates a unique opportunity to monitor the cardio-respiratory function of ambulatory patients in the hospital and beyond.<sup>65</sup> Non-invasive wireless and wearable sensors are now able to monitor physiological variables such as heart rate, heart rate variability, respiratory frequency, arterial oxygen saturation and thoracic fluid content.<sup>65–66</sup> Many of these tools have already received the Food and Drug Administration (FDA) clearance, but independent clinical studies are needed to confirm their accuracy and more importantly to demonstrate their clinical utility and cost-effectiveness in the post-surgical setting.<sup>67</sup> Once it becomes possible to monitor patients during the recovery period (i.e. when early mobilization is highly desirable), smart and robust software are needed to filter artifacts and prevent alarm fatigue.<sup>68</sup> Given the low clinician/patient ratio in surgical wards, various physiological signals and variables also need to be integrated (data fusion) into single warning scores or wellness indexes,<sup>69–71</sup> so that nurses can easily and accurately identify patients who are in the process of worsening condition (Fig. 5). Assuming technical and software challenges (data filtering,

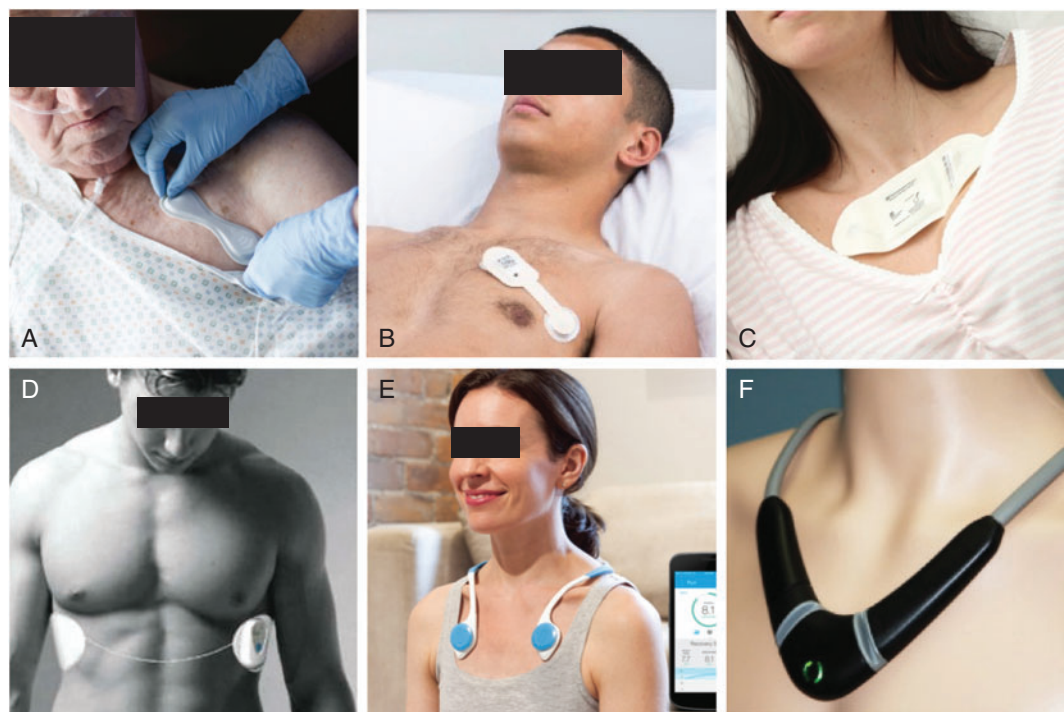

**Fig 4** Examples of wearable and wireless sensors. Medical grade adhesive patches (A from VitalConnect, San Jose, CA, USA, B from Isansys, Abingdon, UK, C from Sensium, Abingdon, UK and D from Intelesens, Belfast, Northern Ireland) and necklaces (E from CloudDX, Kitchener, Canada and F from toSense, San Diego, CA, USA) designed to monitor heart rate, respiratory rate, thoracic fluid content, temperature and/or activity in ambulatory patients.

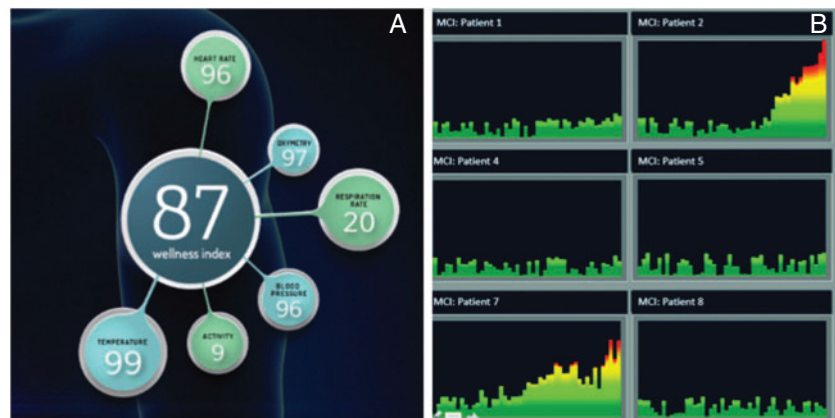

Fig 5 Example of data fusion system. (A) Several variables are integrated to create a single wellness index and (B) self-explanatory graphical display allowing the immediate and visual recognition of patients' deterioration by nurses working in the wards (PhysIQ, Naperville, IL, USA).

data fusion) can be overcome, remote and mobile monitoring may help tackle the clinical and economic burden of postoperative complications and preventable deaths in surgical wards.

### Monitoring functional recovery with activity trackers

Postoperative recovery outcomes are usually assessed by procedure-specific quality of life scores with different patient-reported outcome measures (PROMs) and satisfaction scores. Their usefulness has been questioned because of their subjectivity.<sup>72–73</sup> Several studies have demonstrated a discrepancy between objective functional assessment and different PROMs.<sup>74</sup> Thus, activity levels do not always increase after total hip and knee arthroplasty<sup>74</sup> and objective functional assessments are desirable to better understand the underlying reasons.<sup>75</sup> Future efforts to optimize functional recovery should include objective assessment of function by actigraphy.<sup>76–78</sup> Activity trackers or wearable accelerometers are now ubiquitous. Several studies suggest that some consumer products, placed on the waist, upper arm or ankle, are accurate enough for the objective assessment of mobility.<sup>77–78</sup> However, caution should be exercised when monitoring slow walking speed populations,<sup>79</sup> which is often the case early after surgery. Future studies will need to investigate whether the use of these simple wearable and digital tools can help improve postoperative mobility.

### Electronic checklists

Checklists have been shown to be useful to implement processes and improve quality of care.<sup>80–81</sup> Electronic checklists have been developed to ensure that none of the ERP elements is omitted during the surgical journey. Most of them are available as Apps and have been designed both for patients and caregivers, as well as to improve communication between the two. Although appealing, these tools remain to be evaluated in the context of ERPs before recommending their systematic use.

### Conclusion

Emerging technologies have the potential, in or outside the context of ERPs, to help both patients and caregivers improve quality of surgical care. Prehabilitation could be facilitated by the use of SMS and Apps designed for smoking cessation, promoting physical activity and improving the control of hypertension and diabetes. Several non-invasive haemodynamic monitoring techniques and visual decision support tools are now available to facilitate the individualization of fluid management, a key component of ERPs. Sensors designed to monitor physiological variables should help for the early detection of postoperative clinical deterioration and to decrease preventable deaths. Activity trackers may be useful to monitor objectively early mobilization, a major postoperative element of ERPs. Finally, electronic checklists could be used to ensure that none of the ERP elements is omitted during the surgical journey.

By optimizing compliance to the multiple components of ERPs, digital innovations, non-invasive technologies and wearable sensors have therefore the potential to magnify the clinical and economic benefits of ERPs. Among the growing number of emerging technologies, studies are urgently needed to clarify which tools and solutions have real clinical value and should be implemented.

### Authors' contribution

Contributed to the preparation of the manuscript and approved the final version: all authors.

### Declaration of interest

F.M. has been a consultant to Pulsion Medical Systems, Dixtal, Hamilton Medical and UPMED, and an employee (VP, Global Medical Strategy) of Edwards Lifesciences. He is the founder and managing director of MiCo Sàrl, a Swiss consulting firm for medtech companies and digital health startups.

T.J.G. and H.K. have no conflicts of interest on this subject matter

## References

- Kehlet H. Multimodal approach to control postoperative pathophysiology and rehabilitation. *Br J Anaesth* 1997; **78**: 606–17
- Nicholson A, Lowe MC, Parker J, et al. Systematic review and meta-analysis of enhanced recovery programmes in surgical patients. *Br J Surg* 2014; **101**: 172–88
- Miller TE, Thacker JK, White WD, et al. Reduced length of stay in colorectal surgery after implementation of an enhanced recovery protocol. *Anesth Analg* 2014; **118**: 1052–61
- Thiele RH, Rea KM, Turrentine FE, et al. Standardization of care: impact of an enhanced recovery protocol on length of stay, complications, and direct costs after colorectal surgery. *J Am Coll Surg* 2015; **220**: 430–43
- Maessen J, Dejong CH, Hausel J, et al. A protocol is not enough to implement an enhanced recovery programme for colorectal resection. *Br J Surg* 2007; **94**: 224–31
- Lyon A, Solomon MJ, Harrison JD. A qualitative study assessing the barriers to implementation of enhanced recovery after surgery. *World J Surg* 2014; **38**: 1374–80
- ERAS Compliance Group. The impact of enhanced recovery protocol compliance on elective colorectal cancer resection: results from an international registry. *Ann Surg* 2015; **26**: 1153–9
- Bakker N, Cakir H, Doodeman HJ, et al. Eight years of experience with enhanced recovery after surgery in patients with colon cancer: impact of measures to improve adherence. *Surgery* 2015; **157**: 1130–6
- Pecorelli N, Hershon O, Baldini G, et al. Impact of adherence to care pathway interventions on recovery following bowel resection within an established enhanced recovery program. *Surg Endosc* 2017; **31**: 1760–71
- Kehlet H, Wilmore DW. Evidence-based surgical care and the evolution of fast-track surgery. *Ann Surg* 2008; **248**: 189–98
- Levett DZ, Edwards M, Grocott M, et al. Preparing the patient for surgery to improve outcomes. *Best Pract Res Clin Anaesthesiol* 2016; **30**: 145–57
- Gupta R, Gan TJ. Preoperative nutrition and prehabilitation. *Anesthesiol Clin* 2016; **34**: 143–53
- Mayo NE, Feldman L, Scott S, et al. Impact of preoperative change in physical function on postoperative recovery: argument supporting prehabilitation for colorectal surgery. *Surgery* 2011; **150**: 505–14
- Burke LE, Ma J, Azar KML, et al. Current science on consumer use of mobile health for cardiovascular disease prevention. *Circulation* 2015; **132**: 1157–213
- Chow CK, Redfern J, Hillis GS, et al. Effect of lifestyle-focused text messaging on risk factor modification in patients with coronary heart disease. A randomized clinical trial. *JAMA* 2015; **314**: 1255–63
- Stephens J, Allen J. Mobile phone interventions to increase physical activity and reduce weight: a systematic review. *J Cardiovasc Nurs* 2013; **28**: 320–9
- Uhlrig K, Pqtel K, Ip S, et al. Self-measured blood pressure monitoring in the management of hypertension: a systematic review and meta-analysis. *Ann Intern Med* 2013; **159**: 185–94
- Liang X, Wang Q, Yang X, et al. Effect of mobile phone intervention for diabetes on glycaemic control: a meta-analysis. *Diabet Med* 2011; **28**: 455–63
- Fanning J, Mullen SP, McAuley E. Increasing physical activity with mobile devices: a meta-analysis. *J Med Internet Res* 2012; **14**: e161
- Whittaker R, McRobbie H, Bullen C, et al. Mobile phone-based interventions for smoking cessation. *Cochrane Database Syst Rev* 2012; **11**: CD006611
- Thakkar J, Kurup R, Laba TL, et al. Mobile telephone text messaging for medication adherence in chronic disease: a meta-analysis. *JAMA Intern Med* 2016; **176**: 340–9
- Bellamy MC. Wet, dry or something else? *Br J Anaesth* 2006; **97**: 755–7
- Michard F, Biais M. Rational fluid management: dissecting facts from fiction. *Br J Anaesth* 2012; **108**: 369–71
- Thacker JK, Mountford WK, Ernst FR, et al. Perioperative fluid utilization variability and association with outcomes: Considerations for enhanced recovery efforts in sample US surgical populations. *Ann Surg* 2016; **263**: 502–10
- Thiele RH, Raghunathan K, Brudney CS, et al. American society for enhanced recovery (ASER) and perioperative quality initiative (POQI) joint consensus statement on perioperative fluid management within an enhanced recovery pathway for colorectal surgery. *Periop Med* 2016; **17**: 24
- Cannesson M, Gan TJ. PRO: perioperative goal-directed fluid therapy is an essential element of an enhanced recovery protocol. *Anesth Analg* 2016; **122**: 1258–60
- Pearse RM, Harrison DA, MacDonald N, et al. Effect of perioperative, cardiac output-guided hemodynamic therapy algorithm on outcomes following major gastrointestinal surgery: a randomized clinical trial and systematic review. *JAMA* 2014; **311**: 2181–90
- Benes J, Giglio MT, Brienza N, et al. The effects of goal-directed fluid therapy based on dynamic parameters on post-surgical outcome: a meta-analysis of randomized controlled trials. *Crit Care* 2014; **18**: 584
- Michard F. Hemodynamic monitoring in the era of digital health. *Ann Intensive Care* 2016; **6**: 15
- Kim SH, Lilot M, Sidhu KS, et al. Accuracy and precision of continuous noninvasive arterial pressure monitoring compared with invasive arterial pressure. *Anesthesiology* 2014; **120**
- Maus TM, Reber B, Banks DA, et al. Cardiac output determination from endotracheally measured impedance cardiography: clinical evaluation of endotracheal cardiac output monitor. *J Cardiothorac Vasc Anesth* 2011; **25**: 770–5
- Waldron NH, Miller TE, Thacker JK, et al. A prospective comparison of a noninvasive cardiac output monitor versus esophageal Doppler monitor for goal-directed fluid therapy in colorectal surgery patients. *Anesth Analg* 2014; **118**: 966–75
- Vieillard-Baron A, Slama M, Mayo P, et al. A pilot study on safety and clinical utility of a single-use 72-hour indwelling transesophageal echocardiography probe. *Intensive Care Med* 2013; **39**: 629–35
- Chu H, Wang Y, Sun Y, et al. Accuracy of pleth variability index to predict fluid responsiveness in mechanically ventilated patients: a systematic review and meta-analysis. *J Clin Monit Comput* 2016; **30**: 265–74
- Pestana D, Espinosa E, Eden A, et al. Perioperative goal-directed hemodynamic optimization using noninvasive cardiac output monitoring in major abdominal surgery. A prospective, randomized, multicenter, pragmatic trial: POEMAS study. *Anesth Analg* 2014; **119**: 579–87
- Yang J, Foglesong CP, Canales C, et al. Assessment of postoperative outcomes in relation to pleth variability index (PVI) based on goal-directed therapy. *ASA* 2014; abstract A1207
- Broch O, Carstens A, Gruenevald M, et al. Non-invasive hemodynamic optimization in major abdominal surgery: a feasibility study. *Minerva Anesthesiol* 2016; **82**: 1158–69

38. Joshi GP, Kehlet H. CON: perioperative goal-directed fluid therapy is an essential element of an enhanced recovery protocol? *Anesth Analg* 2016; **122**: 1261–3
39. Srinivasa S, Taylor MH, Singh PP, et al. Randomized clinical trial of goal-directed fluid therapy within an enhanced recovery protocol for elective colectomy. *Br J Surg* 2013; **100**: 66–74
40. Lai CW, Starkie T, Creanor S, et al. Randomized controlled trial of stroke volume optimization during elective major abdominal surgery in patients stratified by aerobic fitness. *Br J Anaesth* 2015; **115**: 578–89
41. Michard F. Decision support for hemodynamic management: from graphical displays to closed loops. *Anesth Analg* 2013; **117**: 876–82
42. Joosten A, Alexander B, Delaporte A, Lilot M, Rinehart J, Cannesson M. Perioperative goal directed therapy using automated closed-loop fluid management: the future? *Anaesthesiol Intensive Ther* 2015; **47**: 517–23
43. Practice guidelines for acute pain management in the perioperative setting: an updated report by the American Society of Anesthesiologists Task Force on Acute Pain Management. *Anesthesiology* 2012; **116**: 248–73
44. Oderda GM, Gan TJ, Johnson BH, et al. Effect of opioid-related adverse events on outcomes in selected surgical patients. *J Pain Palliat Care Pharmacother* 2013; **27**: 62–70
45. Kehlet H, Dahl JB. The value of “multimodal” or “balanced analgesia” in postoperative pain treatment. *Anesth Analg* 1993; **77**: 1048–56
46. Storm H. Changes in skin conductance as a tool to monitor nociceptive stimulation and pain. *Curr Opin Anaesthesiol* 2008; **21**: 796–804
47. Jess G, Pogatzki-Zahn EM, Zahn PK, et al. Monitoring heart rate variability to assess experimentally induced pain using the analgesia nociception index. A randomised volunteer study. *Eur J Anaesth* 2016; **33**: 118–25
48. Melia U, Gabarron E, Agusti M, et al. Comparison of the qCON and qNOX indices for the assessment of unconsciousness level and noxious stimulation response during surgery. *J Clin Monit Comput* 2016; epub ahead of print
49. Ledowski T, Tiong WS, Lee C, Wong B, Fiori T, Parker N. Analgesia nociception index: evaluation as a new parameter for acute postoperative pain. *Br J Anaesth* 2013; **111**: 627–9
50. Cowen R, Stasiowska MK, Laycock H, et al. Assessing pain objectively: the use of physiological markers. *Anaesthesia* 2015; **70**: 828–47
51. Martini CH, Boon M, Broens SJL, et al. Ability of the nociception level, a multiparameter composite of autonomic signals, to detect noxious stimuli during propofol-remifentanyl anesthesia. *Anesthesiology* 2015; **123**: 524–34
52. Edry R, Recea V, Dikust Y, et al. Preliminary intraoperative validation of the nociception level index. A noninvasive nociception monitor. *Anesthesiology* 2016; **125**: 193–203
53. The International Surgical Outcomes Study Group. Global patient outcomes after elective surgery: prospective cohort study in 27 low-, middle-, and high-income countries. *Br J Anaesth* 2016; **117**: 601–9
54. Bartels K, Karhausen J, Clambey ET, et al. Perioperative organ injury. *Anesthesiology* 2013; **119**: 1474–89
55. Boehm O, Baumgartner G, Hoefft A. Epidemiology of the high-risk population: perioperative risk and mortality after surgery. *Curr Opin Crit Care* 2015; **21**: 322–7
56. Ghaferi AA, Birkmeyer JD, Dimick JB. Variation in hospital mortality associated with inpatient surgery. *N Engl J Med* 2009; **361**: 1368–75
57. Abenstein JP, Narr BJ. An ounce of prevention may equate to a pound of cure. Can early detection and intervention prevent adverse events? *Anesthesiology* 2010; **112**: 272–3
58. Overdyk FJ, Carter R, Maddox RR, et al. Continuous oximetry/capnometry monitoring reveals frequent desaturation and bradypnea during patient-controlled analgesia. *Anesth Analg* 2007; **105**: 412–8
59. Weigner MB, Lee LA; for the Anesthesia Patient Safety Foundation. No patient shall be harmed by opioid-induced respiratory depression. *APSF Newsletter* 2011; **26**: 21–40
60. Taenzer AH, Pyke JB, McGrath SP, et al. Impact of pulse oximetry surveillance on rescue events and intensive care unit transfers. A before-and-after concurrence study. *Anesthesiology* 2010; **112**: 282–7
61. Botto F, Alonso-Coello P, Chan MT, et al. Myocardial injury after noncardiac surgery: a large, international, prospective cohort study establishing diagnostic criteria, characteristics, predictors, and 30-day outcomes. *Anesthesiology* 2014; **120**: 564–78
62. Franklin C, Mathew J. Developing strategies to prevent in-hospital cardiac arrest: analyzing responses of physicians and nurses in the hours before the event. *Crit Care Med* 1994; **22**: 244–7
63. Bellomo R, Ackerman M, Bailey M, et al. A controlled trial of electronic automated advisory vital signs monitoring in general hospital wards. *Crit Care Med* 2012; **40**: 2349–61
64. Brown H, Terrence J, Vasquez P, et al. Continuous monitoring in an inpatient medical-surgical unit: a controlled clinical trial. *Am J Med* 2014; **127**: 226–32
65. Michard F. A sneak peek into digital innovations and wearable sensors for cardiac monitoring. *J Clin Monit Comput* 2017; **31**: 253–9
66. Donnelly N, Harper R, McCanderson J, et al. Development of a ubiquitous clinical monitoring solution to improve patient safety and outcomes. *Conf Proc IEEE Eng Med Biol Soc* 2012; **2012**: 6088–73
67. McGillion M, Yost J, Turner A, et al. Technology-enabled remote monitoring and self-management—Vision for patient empowerment following cardiac and vascular surgery: User testing and randomized controlled trial protocol. *JMIR Res Protoc* 2016; **5**: e149
68. Chen L, Dubrawski A, Wang D, et al. Using supervised machine learning to classify real alerts and artifact in online multisignal vital monitoring data. *Crit Care Med* 2016; **44**: e456–63
69. Hravnak M, Edwards L, Clontz A, et al. Defining the incidence of cardiorespiratory instability in patients in step-down units using an electronic integrated monitoring system. *Arch Intern Med* 2008; **168**: 1300–8
70. Ronen M, Weissbrod R, Overdyk FJ, et al. Smart respiratory monitoring: clinical development and validation of the IPI (integrated pulmonary index) algorithm. *J Clin Monit Comput* 2017; **31**: 435–42
71. Pinsky MR, Clermont G, Hravnak M. Predicting cardiorespiratory instability. *Crit Care* 2016; **20**: 70
72. Konan S, Hossain F, Patel S, et al. Measuring function after hip and knee surgery: the evidence to support performance-based functional outcome tasks. *Bone Joint J* 2014; **96**: 1431–5
73. Shirley ED, Sanders JO. Measuring quality of care with patient satisfaction scores. *J Bone Joint Surg Am* 2016; **98**: e83
74. Harding P, Holland AE, Delany C, et al. Do activity levels increase after total hip and knee arthroplasty? *Clin Orthop Relat Res* 2014; **472**: 1502–11
75. Webster F, Perruccio AV, Jenkinson R, et al. Understanding why people do or do not engage in activities following total joint replacement: a longitudinal qualitative study. *Osteoarthritis Cartilage* 2015; **23**: 860–7



76. Luna IE, Peterson B, Kehlet H, et al. Individualized assessment of post-arthroplasty recovery by actigraphy—a methodology study. *J Clin Monit Comput* 2016; epub ahead of print
77. Cook DJ, Thompson JE, Prinsen SK, et al. Functional recovery in the elderly after major surgery: assessment of mobility recovery using wireless technology. *Ann Thorac Surg* 2013; **96**: 1057–61
78. Mobbs RJ, Phan K, Maharaj M, et al. Physical activity measured with accelerometer and self-rated disability in lumbar spine surgery: a prospective study. *Global Spine J* 2016; **6**: 459–64
79. Beevi FH, Miranda J, Pedersen CF, et al. An evaluation of commercial pedometers for monitoring slow walking speed populations. *Telemed J E Health* 2016; **22**: 441–9
80. Pronovost P, Needham D, Berenholtz S, et al. An intervention to decrease catheter-related bloodstream infections in the ICU. *N Engl J Med* 2006; **355**: 2725–32
81. Haynes AB, Weiser TG, Berry WR, et al. A surgical safety checklist to reduce morbidity and mortality in a global population. *N Engl J Med* 2009; **360**: 491–9

Handling editor: Jonathan Hardman
